# Supplementary material
Source: publisher figshare collection journal article supplement (https://brill.figshare.com/ndownloader/files/39303740)
Supplement: Supplementary file 1 [file 39303740]

# **Differences in Time Perspective in Representatives of Various Generations**

**Pawel Kot**

Institute of Psychology, John Paul II Catholic University of Lublin, 20-950 Lublin, Poland

E-mail: kotpawel@o2.pl

ORCID iD: 0000-0003-1471-1228

**Supplementary material**

**Table 1.**

Generation category vs time perspective.

| Time perspective   | Generation category | <i>M</i> | <i>SD</i> | <i>F</i> | $\eta^2$ | <i>Post-hoc</i>                                                                                                                                                                                                                                                                                                               |
|--------------------|---------------------|----------|-----------|----------|----------|-------------------------------------------------------------------------------------------------------------------------------------------------------------------------------------------------------------------------------------------------------------------------------------------------------------------------------|
| past negative      |                     | 3.01     | .71       | 147.16** | .225     | past negative < past positive; past negative < present hedonistic<br>past negative > present fatalistic; past negative < future<br>past positive > present hedonistic; past positive > present fatalistic<br>past positive > future; present hedonistic > present fatalistic<br>present fatalistic < future                   |
| past positive      |                     | 3.60     | .63       |          |          |                                                                                                                                                                                                                                                                                                                               |
| present hedonistic |                     | 3.38     | .58       |          |          |                                                                                                                                                                                                                                                                                                                               |
| present fatalistic |                     | 2.72     | .60       |          |          |                                                                                                                                                                                                                                                                                                                               |
| future             |                     | 3.32     | .69       |          |          |                                                                                                                                                                                                                                                                                                                               |
|                    | veterans            | 3.16     | .68       | 2.79*    | .025     | veterans < X<br>baby boomers < X                                                                                                                                                                                                                                                                                              |
|                    | baby boomers        | 3.16     | .70       |          |          |                                                                                                                                                                                                                                                                                                                               |
|                    | X                   | 3.30     | .78       |          |          |                                                                                                                                                                                                                                                                                                                               |
|                    | Y                   | 3.21     | .72       |          |          |                                                                                                                                                                                                                                                                                                                               |
|                    | Z                   | 3.22     | .70       |          |          |                                                                                                                                                                                                                                                                                                                               |
| past negative      | veterans            | 3.26     | .61       |          |          | past negative veterans > past negative X; past negative veterans ><br>past negative Y; past negative veterans > past negative Z;                                                                                                                                                                                              |
|                    | baby boomers        | 3.06     | .68       |          |          |                                                                                                                                                                                                                                                                                                                               |
|                    | X                   | 2.94     | .82       |          |          |                                                                                                                                                                                                                                                                                                                               |
|                    | Y                   | 2.85     | .67       |          |          |                                                                                                                                                                                                                                                                                                                               |
|                    | Z                   | 2.95     | .73       |          |          |                                                                                                                                                                                                                                                                                                                               |
| past positive      | veterans            | 3.70     | .71       |          |          | past positive veterans > past positive Y; past positive baby boomers<br>> past positive Y;                                                                                                                                                                                                                                    |
|                    | baby boomers        | 3.75     | .67       |          |          |                                                                                                                                                                                                                                                                                                                               |
|                    | X                   | 3.61     | .56       |          |          |                                                                                                                                                                                                                                                                                                                               |
|                    | Y                   | 3.38     | .57       |          |          |                                                                                                                                                                                                                                                                                                                               |
|                    | Z                   | 3.58     | .54       |          |          |                                                                                                                                                                                                                                                                                                                               |
| present hedonistic | veterans            | 3.19     | .57       | 19.10**  | .117     | present hedonistic veterans < present hedonistic X; present<br>hedonistic veterans < present hedonistic Z; present hedonistic baby<br>boomers < present hedonistic X; present hedonistic baby boomers <<br>present hedonistic Z; present hedonistic X > present hedonistic Y;<br>present hedonistic Y < present hedonistic Z; |
|                    | baby boomers        | 3.28     | .61       |          |          |                                                                                                                                                                                                                                                                                                                               |
|                    | X                   | 3.52     | .54       |          |          |                                                                                                                                                                                                                                                                                                                               |
|                    | Y                   | 3.23     | .43       |          |          |                                                                                                                                                                                                                                                                                                                               |
|                    | Z                   | 3.66     | .57       |          |          |                                                                                                                                                                                                                                                                                                                               |
| present fatalistic | veterans            | 2.73     | .47       |          |          |                                                                                                                                                                                                                                                                                                                               |
|                    | baby boomers        | 2.80     | .61       |          |          |                                                                                                                                                                                                                                                                                                                               |
|                    | X                   | 2.65     | .68       |          |          |                                                                                                                                                                                                                                                                                                                               |
|                    | Y                   | 2.65     | .63       |          |          |                                                                                                                                                                                                                                                                                                                               |
|                    | Z                   | 2.75     | .60       |          |          |                                                                                                                                                                                                                                                                                                                               |
| future             | veterans            | 2.92     | .59       |          |          |                                                                                                                                                                                                                                                                                                                               |

|             |              |      |     |                                                                                                                                                                                                                                                                                                                                                                                                                                                                                                                                                                                                                                                                                                                                                                                                                                                                                                                                                                                                                                                                                                                                                                                                                                                                                                                                                                                                                                                                                                                                                                                                                                                                                                                                                      |
|-------------|--------------|------|-----|------------------------------------------------------------------------------------------------------------------------------------------------------------------------------------------------------------------------------------------------------------------------------------------------------------------------------------------------------------------------------------------------------------------------------------------------------------------------------------------------------------------------------------------------------------------------------------------------------------------------------------------------------------------------------------------------------------------------------------------------------------------------------------------------------------------------------------------------------------------------------------------------------------------------------------------------------------------------------------------------------------------------------------------------------------------------------------------------------------------------------------------------------------------------------------------------------------------------------------------------------------------------------------------------------------------------------------------------------------------------------------------------------------------------------------------------------------------------------------------------------------------------------------------------------------------------------------------------------------------------------------------------------------------------------------------------------------------------------------------------------|
|             | baby boomers | 2.93 | .54 | future veterans < future X; future veterans < future Y; future veterans < future Z; future baby boomers < future X; future baby boomers < future Y; future baby boomers < future Z; future X > future Z; future Y > future Z;                                                                                                                                                                                                                                                                                                                                                                                                                                                                                                                                                                                                                                                                                                                                                                                                                                                                                                                                                                                                                                                                                                                                                                                                                                                                                                                                                                                                                                                                                                                        |
|             | X            | 3.78 | .59 |                                                                                                                                                                                                                                                                                                                                                                                                                                                                                                                                                                                                                                                                                                                                                                                                                                                                                                                                                                                                                                                                                                                                                                                                                                                                                                                                                                                                                                                                                                                                                                                                                                                                                                                                                      |
|             | Y            | 3.95 | .47 |                                                                                                                                                                                                                                                                                                                                                                                                                                                                                                                                                                                                                                                                                                                                                                                                                                                                                                                                                                                                                                                                                                                                                                                                                                                                                                                                                                                                                                                                                                                                                                                                                                                                                                                                                      |
|             | Z            | 3.17 | .55 |                                                                                                                                                                                                                                                                                                                                                                                                                                                                                                                                                                                                                                                                                                                                                                                                                                                                                                                                                                                                                                                                                                                                                                                                                                                                                                                                                                                                                                                                                                                                                                                                                                                                                                                                                      |
| Interaction |              |      |     | past negative veterans < past positive veterans; past negative veterans > present fatalistic veterans; past negative veterans > future veterans; past positive veterans > present hedonistic veterans; past positive veterans > present fatalistic veterans; past positive veterans > future veterans; present hedonistic veterans > present fatalistic veterans; present hedonistic veterans > future veterans; past negative baby boomers < past positive baby boomers; past negative baby boomers > present fatalistic baby boomers; past positive baby boomers > present hedonistic baby boomers; past positive baby boomers > present fatalistic baby boomers; past positive baby boomers > future baby boomers; present hedonistic baby boomers > present fatalistic baby boomers; present hedonistic baby boomers > future baby boomers; past negative X < past positive X; past negative X < present hedonistic X; past negative X > present fatalistic X; past negative X < future X; past positive X > present fatalistic X; present hedonistic X > present fatalistic X; present hedonistic X < future X; present fatalistic X < future X; past negative Y < past positive Y; past negative Y < present hedonistic Y; past negative Y < future Y; past positive Y > present fatalistic Y; past positive Y < future Y; present hedonistic Y > present fatalistic Y; present hedonistic Y < future Y; present fatalistic Y < future Y; past negative Z < past positive Z; past negative Z < present hedonistic Z; past negative Z > present fatalistic Z; past positive Z > present fatalistic Z; past positive Z > future Z; present hedonistic Z > present fatalistic Z; present hedonistic Z > future Z; present fatalistic Z < future Z |

\*  $p < .05$ ; \*\*  $p < .01$
